# Supplementary material for: CH4 and H2S reforming to CH3SH and H2 catalyzed by metal-promoted Mo6S8 clusters: a first-principles micro-kinetic study
Source: Royal Society of Chemistry journal article supplement (doi:10.1039/c7cy00857k), 2017-01-01

### Supplementary Information: CH<sub>4</sub> and H<sub>2</sub>S reforming to CH<sub>3</sub>SH and H<sub>2</sub> catalyzed by metal promoted Mo<sub>6</sub>S<sub>8</sub> cluster: a first-principles micro-kinetic study

William Taifan,<sup>†</sup>Adam Arvidsson,<sup>‡</sup>Eric Nelson,<sup>†</sup> Anders Hellman,<sup>‡</sup> and Jonas Baltrusaitis<sup>\*,†</sup>

<sup>†</sup>Department of Chemical and Biomolecular Engineering, Lehigh University, B336 Iacocca Hall, 111 Research Drive, Bethlehem, PA 18015, USA

<sup>‡</sup>Department of Applied Physics, Chalmers University of Technology, SE-421 96 Göteborg, Sweden

**Figure S1. Structures adsorbed on Mo<sub>6</sub>S<sub>8</sub>**

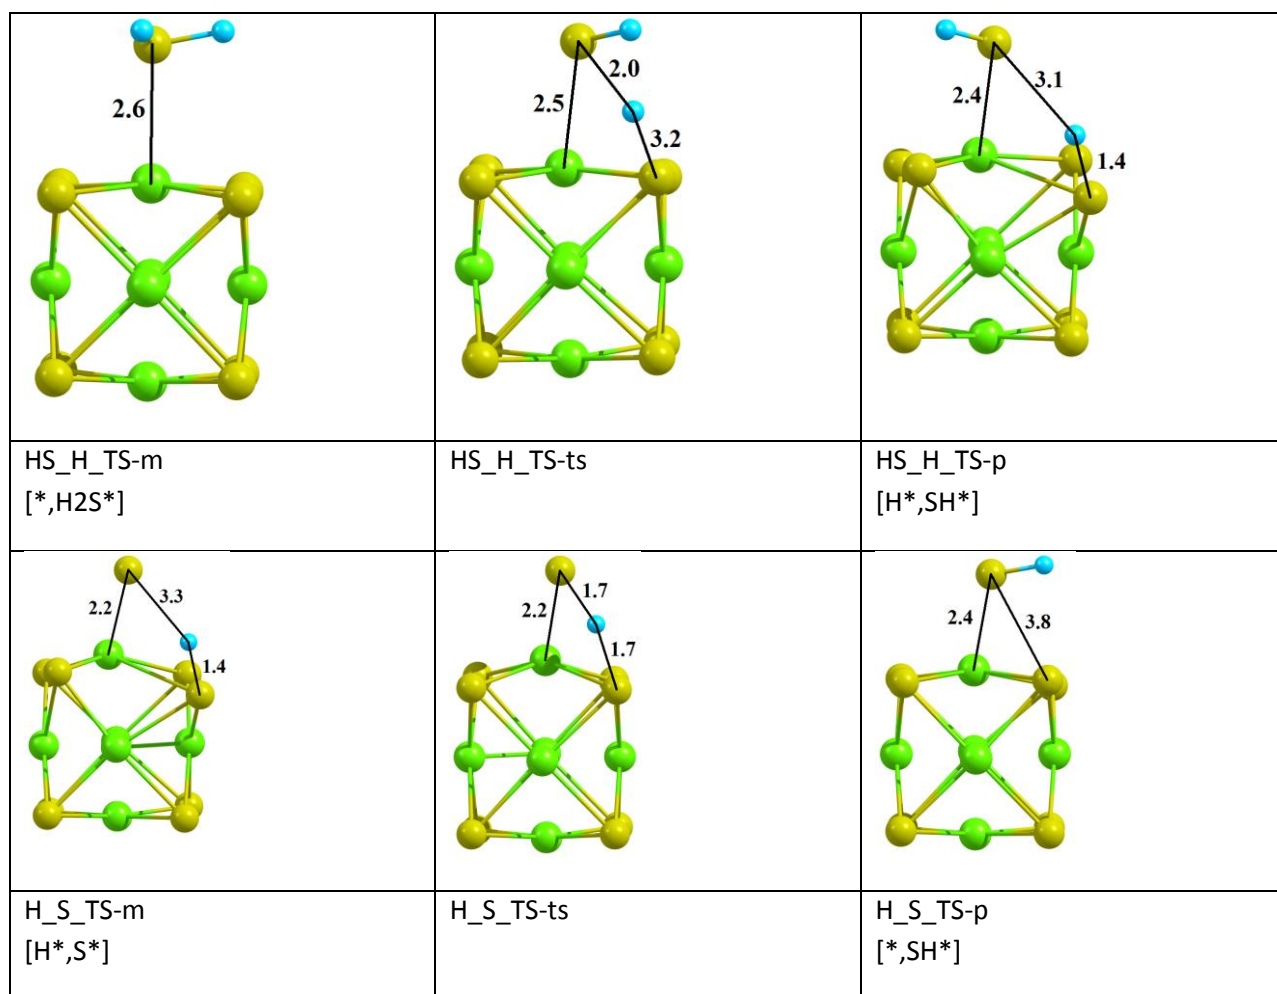

|                                                                                     |                                                                                     |                                                                                       |
|-------------------------------------------------------------------------------------|-------------------------------------------------------------------------------------|---------------------------------------------------------------------------------------|
| 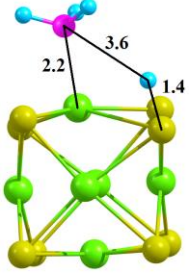   |    |    |
| <p>CH3_H_TS-m<br/>[H*,CH3*]</p>                                                     | <p>CH3_H_TS-ts</p>                                                                  | <p>CH3_H_TS-p<br/>[* ,CH4*]</p>                                                       |
|    |    |    |
| <p>CH3_S_TS-m<br/>[CH3*,S*]</p>                                                     | <p>CH3_S_TS-ts</p>                                                                  | <p>CH3_S_TS-p<br/>[* ,CH3S*]</p>                                                      |
|  |  |  |
| <p>CH3S_H_TS-m<br/>[H*,CH3S*]</p>                                                   | <p>CH3S_H_TS-ts</p>                                                                 | <p>CH3S_H_TS-p<br/>[* ,CH3SH*]</p>                                                    |

|                                                                                     |                                                                                     |                                                                                       |
|-------------------------------------------------------------------------------------|-------------------------------------------------------------------------------------|---------------------------------------------------------------------------------------|
| 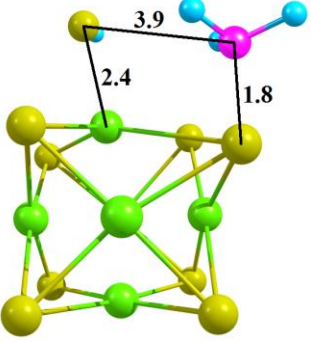   |    |    |
| <p>CH3_SH_TS-m<br/>[CH3*,SH*]</p>                                                   | <p>CH3_SH_TS-ts</p>                                                                 | <p>CH3_SH_TS-p<br/>[* ,CH3SH*]</p>                                                    |
|   |    |   |
| <p>H_H_TS-m<br/>[H*,H*]</p>                                                         | <p>H_H_TS-ts</p>                                                                    | <p>H_H_TS-p<br/>[* ,H2*]</p>                                                          |
|  |  |  |
| <p>H*</p>                                                                           | <p>S*</p>                                                                           | <p>*</p>                                                                              |

**Figure S2. Structures adsorbed on NiMo<sub>6</sub>S<sub>8</sub>**

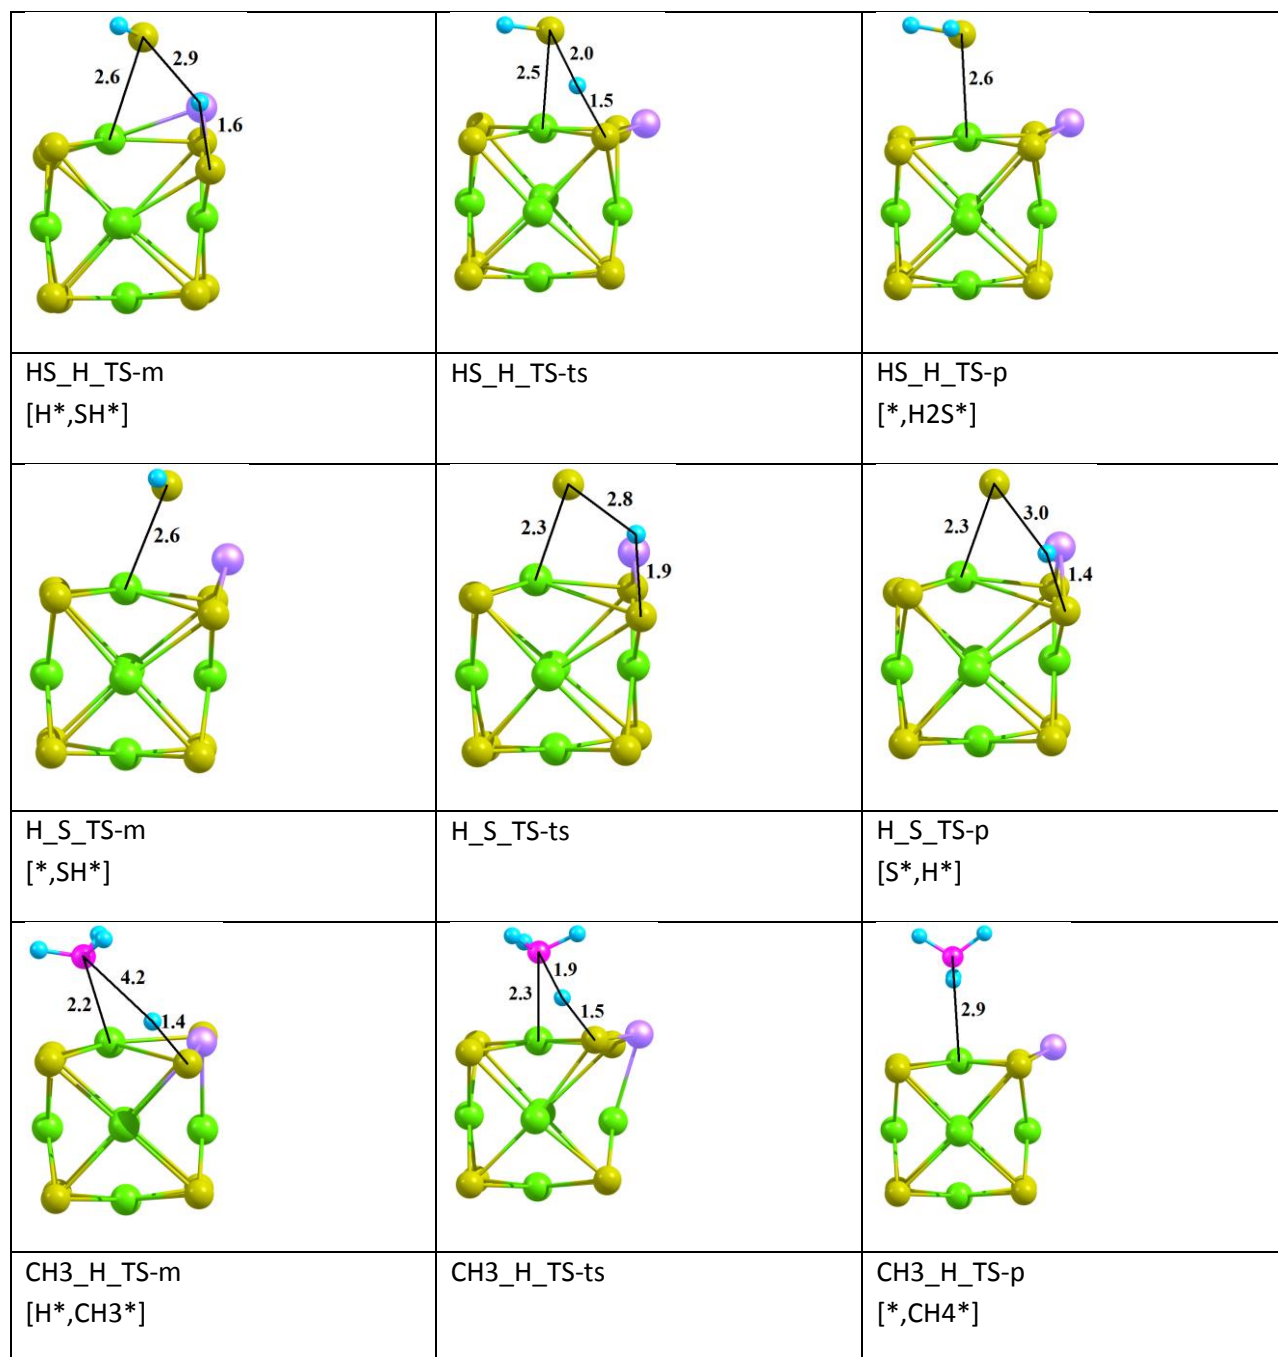

|                                   |                     |                                   |
|-----------------------------------|---------------------|-----------------------------------|
|                                   |                     |                                   |
| <p>CH3_S_TS-m<br/>[*,CH3S*]</p>   | <p>CH3_S_TS-ts</p>  | <p>CH3_S_TS-p<br/>[CH3*,S*]</p>   |
|                                   |                     |                                   |
| <p>CH3S_H_TS-m<br/>[H*,CH3S*]</p> | <p>CH3S_H_TS-ts</p> | <p>CH3S_H_TS-p<br/>[*,CH3SH*]</p> |
|                                   |                     |                                   |
| <p>CH3_SH_TS-m<br/>[*,CH3SH*]</p> | <p>CH3_SH_TS-ts</p> | <p>CH3_SH_TS-p<br/>[CH3*,SH*]</p> |

|                                                                                   |                                                                                   |                                                                                     |
|-----------------------------------------------------------------------------------|-----------------------------------------------------------------------------------|-------------------------------------------------------------------------------------|
| 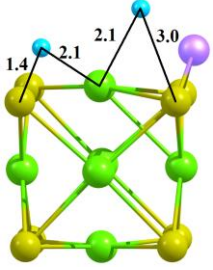 |  |  |
| <p>H_H_TS-m<br/>[H*,H*]</p>                                                       | <p>H_H_TS-ts</p>                                                                  | <p>H_H_TS-p<br/>[* ,H2*]</p>                                                        |
|  |  |                                                                                     |
| <p>*</p>                                                                          | <p>H*</p>                                                                         |                                                                                     |



**Figure S3. Structures adsorbed on  $\text{KM}_6\text{S}_8$**

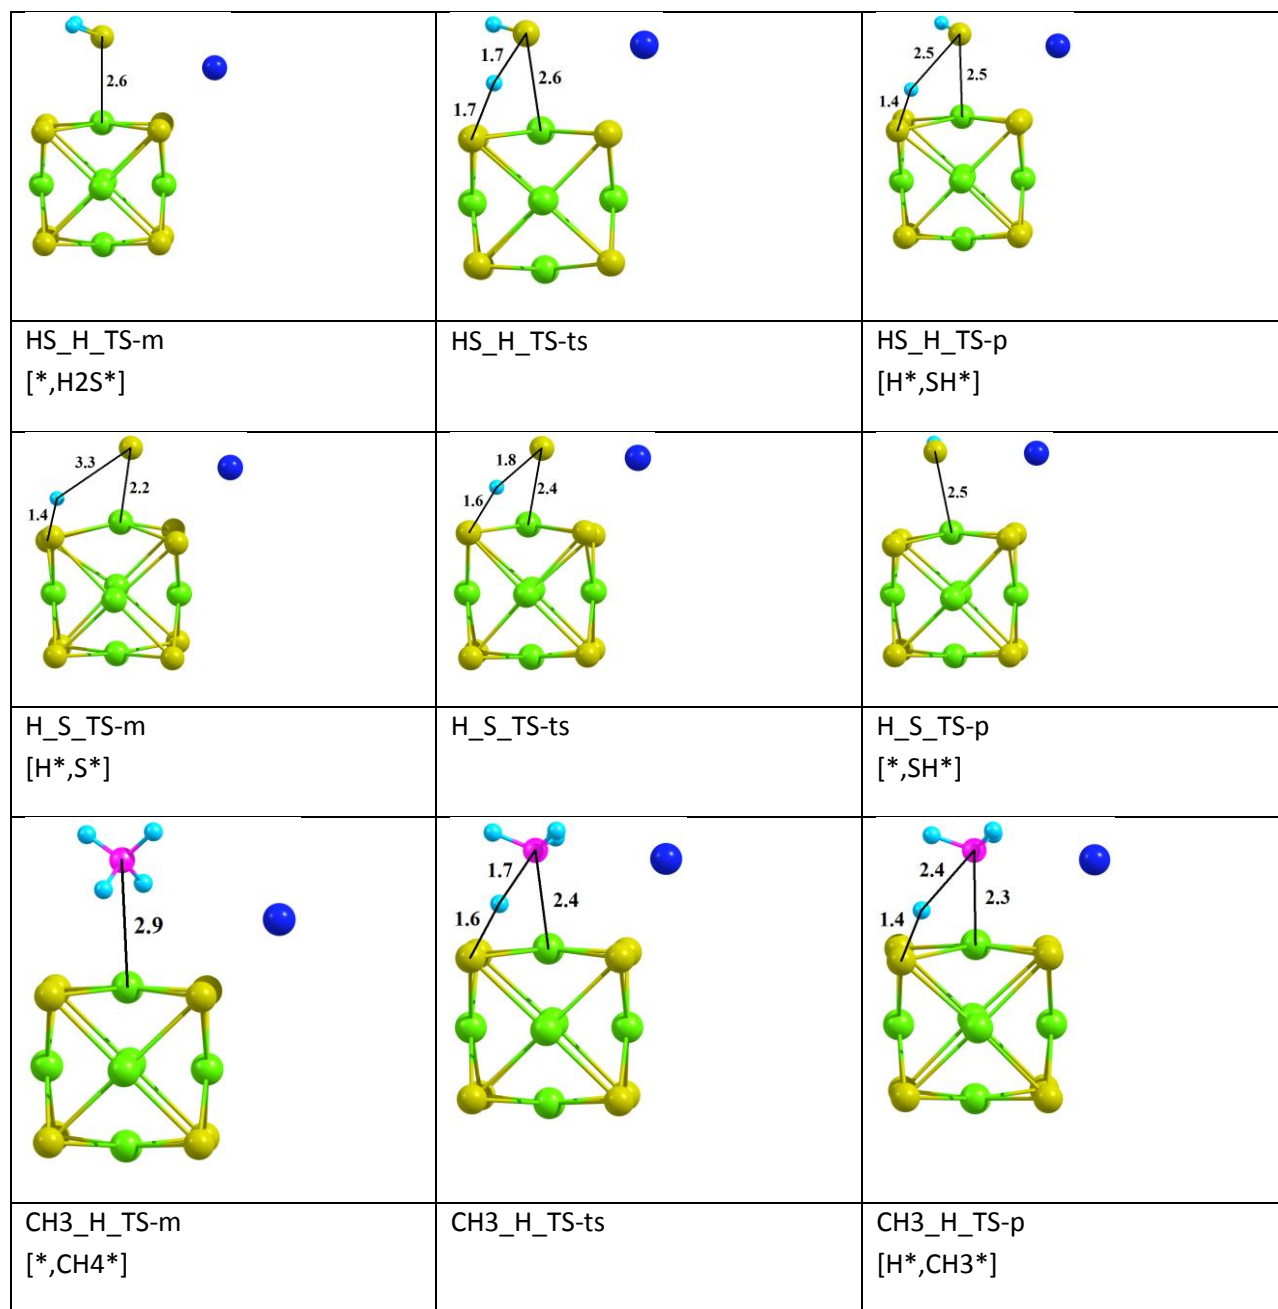

|                                   |                     |                                    |
|-----------------------------------|---------------------|------------------------------------|
|                                   |                     |                                    |
| <p>CH3_S_TS-m<br/>[CH3*,S*]</p>   | <p>CH3_S_TS-ts</p>  | <p>CH3_S_TS-p<br/>[* ,CH3S*]</p>   |
|                                   |                     |                                    |
| <p>CH3S_H_TS-m<br/>[H*,CH3S*]</p> | <p>CH3S_H_TS-ts</p> | <p>CH3S_H_TS-p<br/>[* ,CH3SH*]</p> |
|                                   |                     |                                    |
| <p>CH3_SH-TS-m<br/>[CH3*,SH*]</p> | <p>CH3_SH-TS-ts</p> | <p>CH3_SH-TS-p<br/>[* ,CH3SH*]</p> |



|                             |                  |                             |
|-----------------------------|------------------|-----------------------------|
|                             |                  |                             |
| <p>H_H_TS-m<br/>[H*,H*]</p> | <p>H_H_TS-ts</p> | <p>H_H_TS-p<br/>[*,H2*]</p> |
|                             |                  |                             |
| <p>*</p>                    | <p>*H</p>        |                             |

**Figure S4.** Gibbs free energy landscapes for the bare, K- and Ni-promoted  $\text{Mo}_6\text{S}_8$  clusters as evaluated at 1200 K. Two parallel pathways are shown, a more direct pathway from  $[\text{CH}_3^*,*]$  and  $[*,\text{SH}^*]$ , and a longer, stepwise pathway through splitting SH and forming  $\text{CH}_3\text{S}$  which is then hydrogenated (lighter shade).

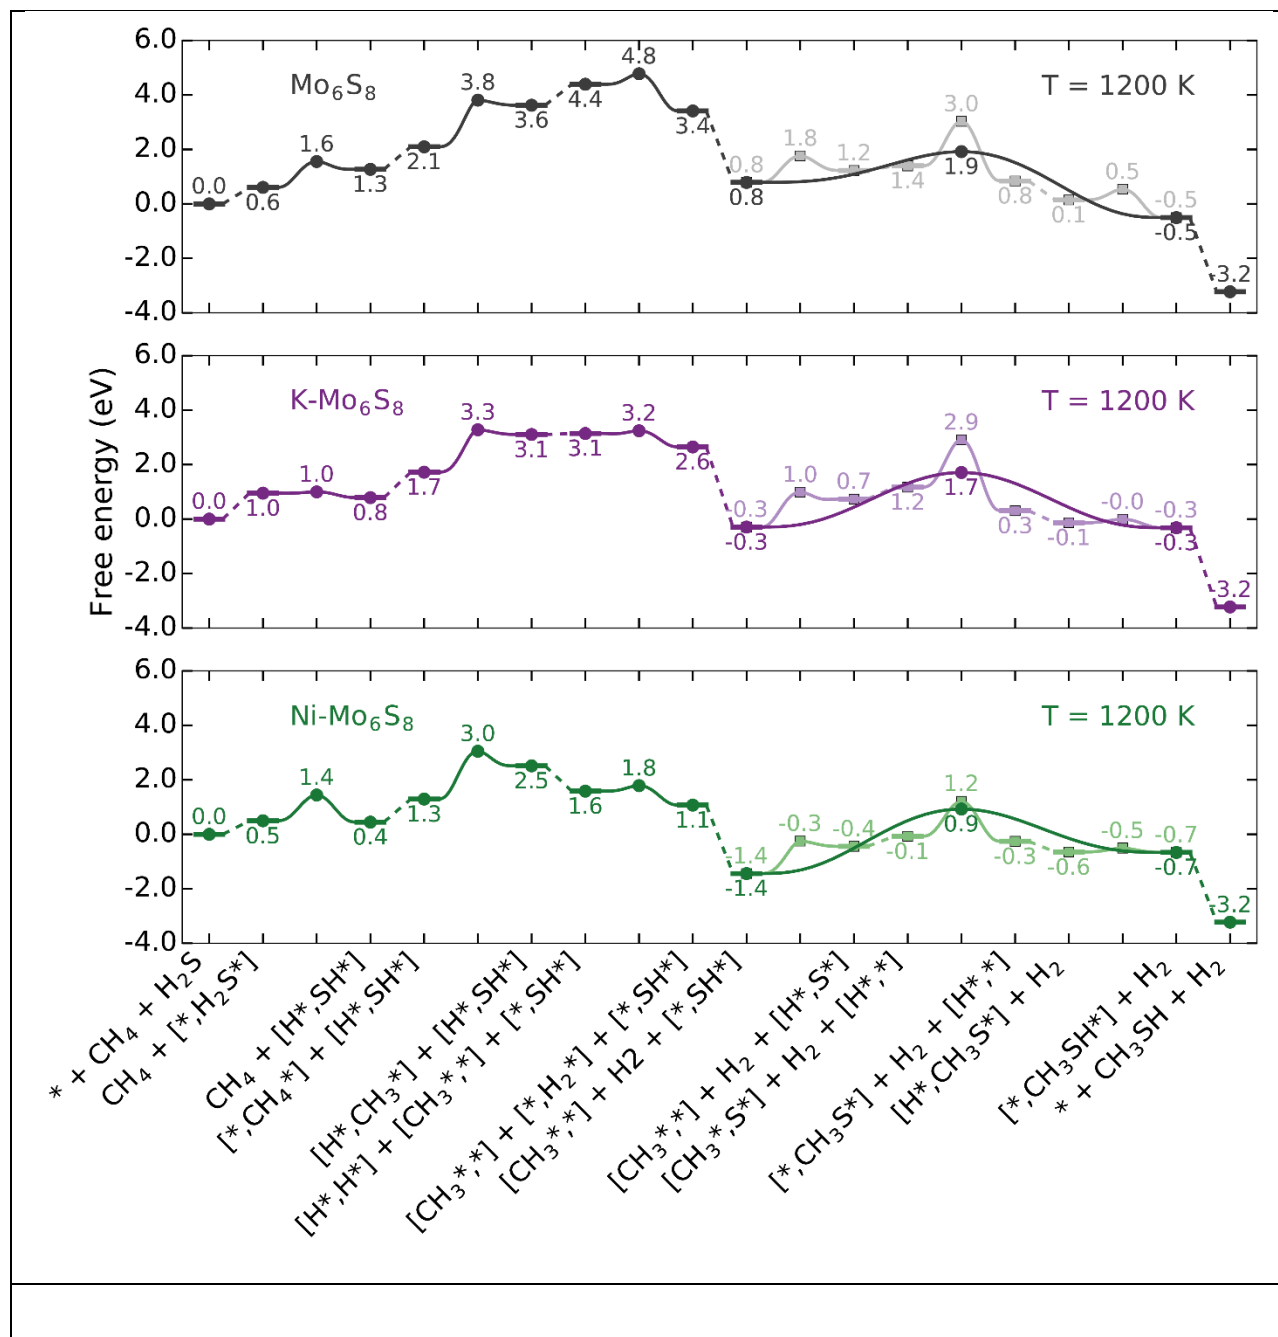

**Figure S5.** The coverage of various reaction intermediates on the bare (grey), K-promoted (purple) and Ni-promoted (green)  $\text{Mo}_6\text{S}_8$  clusters as a function of temperature.

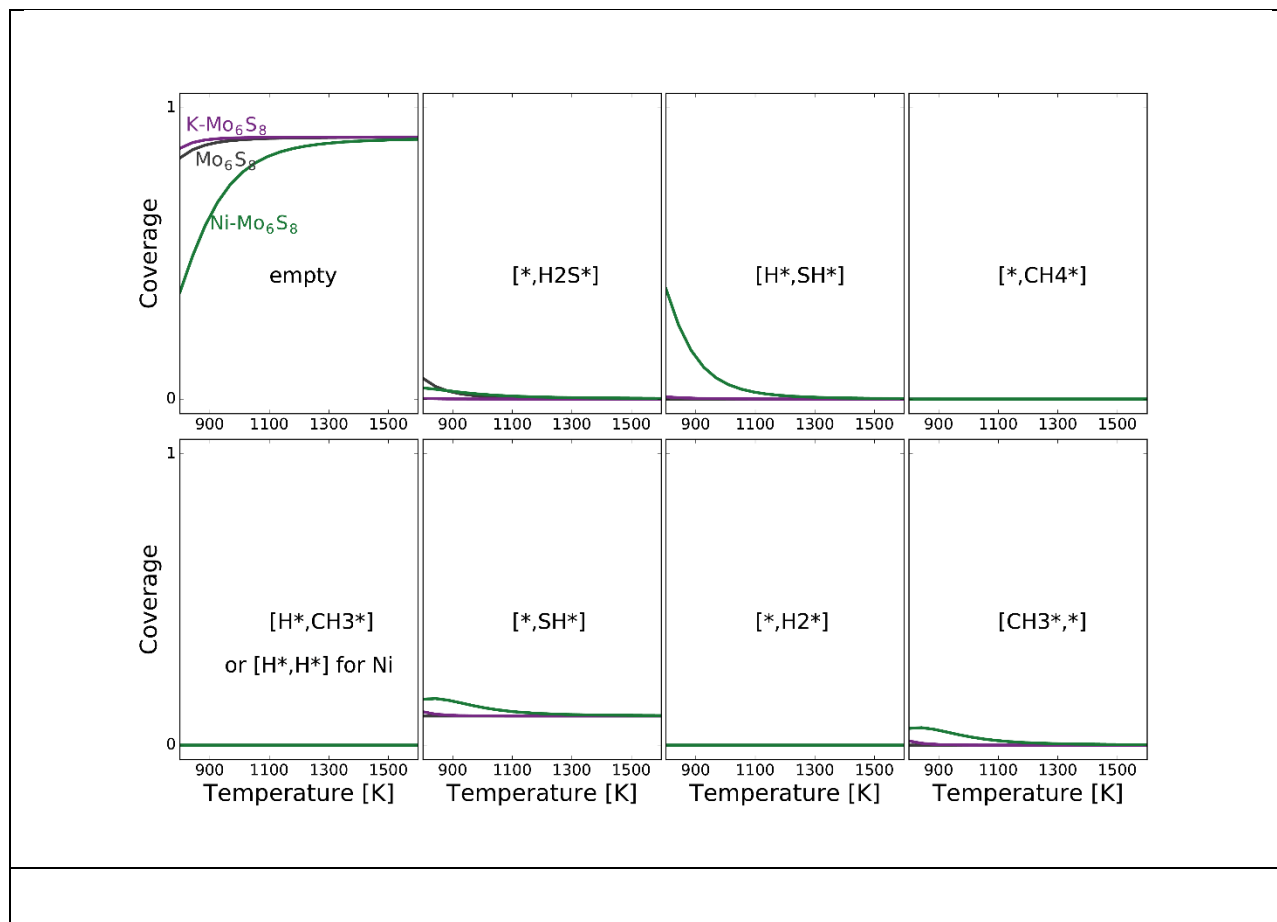

Figure S6. Bader charges for the K- and Ni-promoted clusters as well as the unpromoted cluster. Compared to the Bader charge for the isolated atoms, 8.86 for K and 9.95 for Ni, this demonstrates that the promoter atoms transfer charge to the clusters.

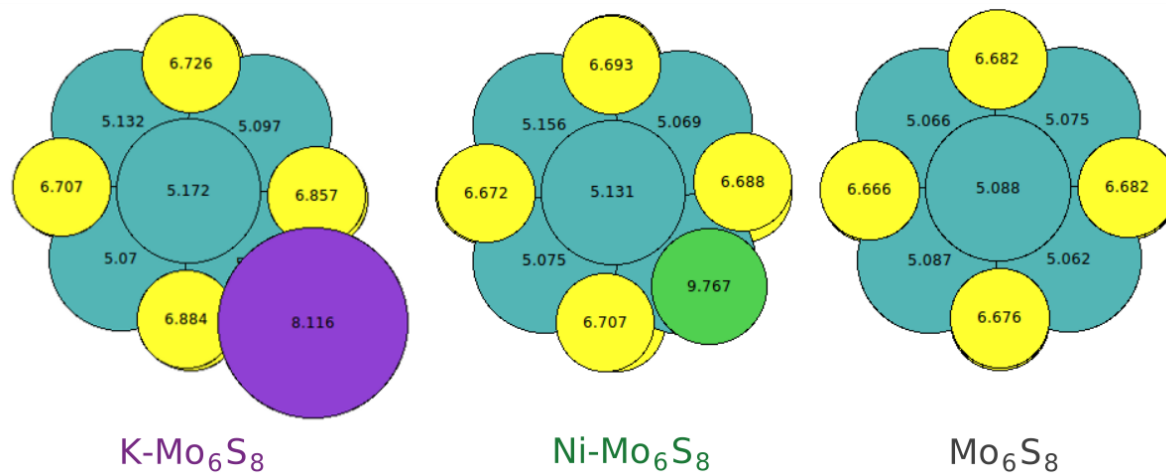

**Figure S7.** Charge density difference between the promoted cluster and the promoter atom isolated for K- and Ni-Mo<sub>6</sub>S<sub>8</sub>. Blue meaning reduced charge (more positive) and yellow an increased charge (more negative). Clearly both K and Ni donate charge to the cluster, which is distributed equally over the cluster atoms. The isosurfaces demonstrate that the electron transferred from K has an s-character while the electron transferred from Ni has a d-character.

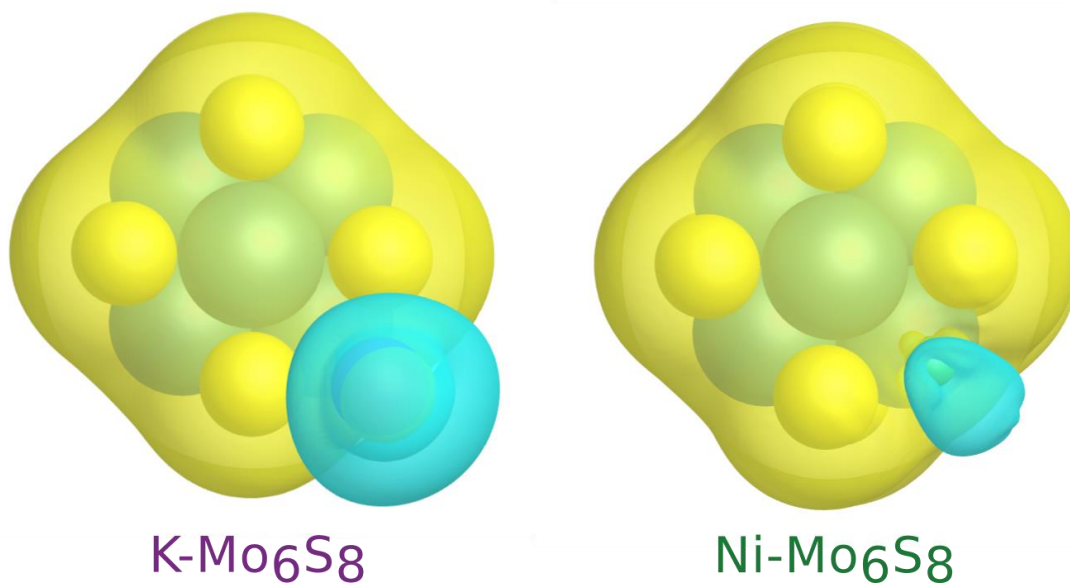

**Figure S8.** The turn-over frequency as a function of the partial pressure of the products (CH<sub>3</sub>SH and H<sub>2</sub>) at T=1200 K. This demonstrates that the pressure of the products must be low (as is shown in figure 3 in the article) and that the TOF does not change significantly when choosing a higher pressure. The red point marks the pressure used otherwise

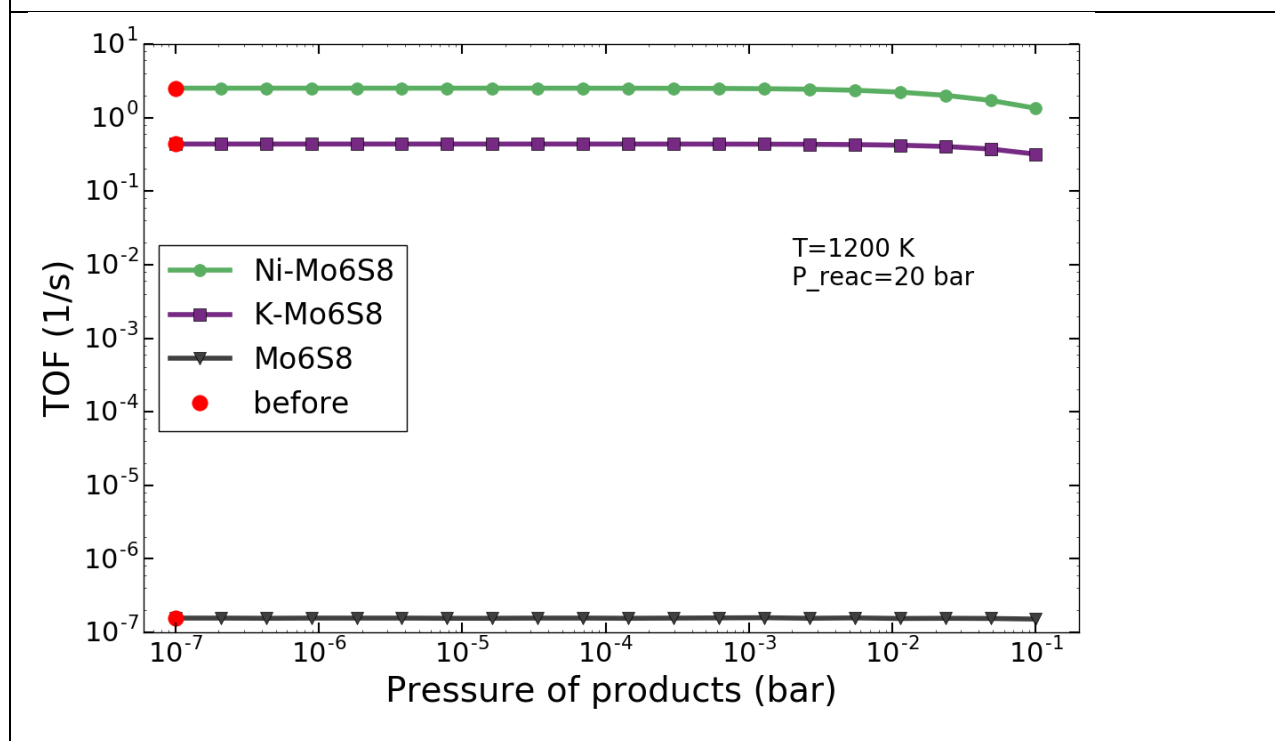



**Figure S9.** The turn-over frequency as a function of the partial pressure of the reactants (CH<sub>4</sub> and H<sub>2</sub>S) at T=1200 K. This demonstrates that the pressure of the changes the TOF at significantly lower pressures than what is used in the article, but with the same shift for all clusters. The red point marks the pressure used otherwise.

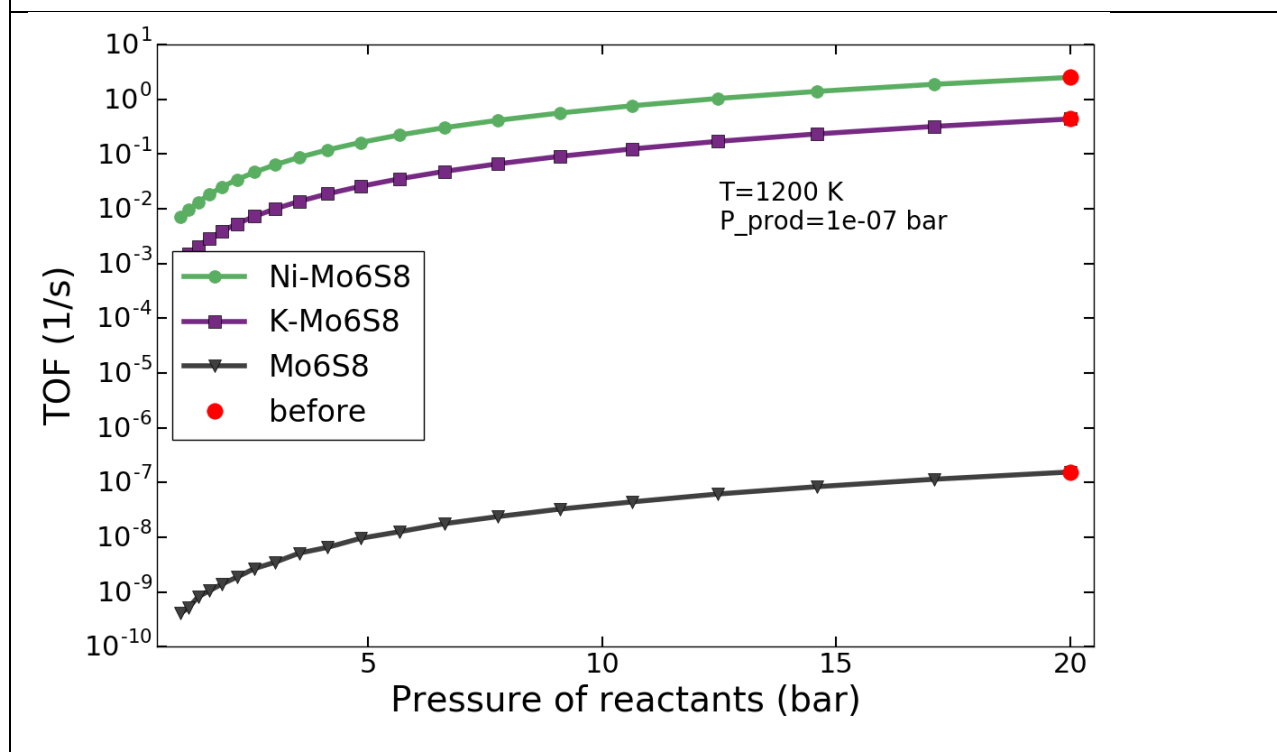

Supplement: c7cy00857k1.pdf [file c7cy00857k1.pdf]
